# Supplementary material
Source: MDPI journal article supplement (https://www.mdpi.com/2073-4395/11/1/178)
Supplement: s1 [file s1]

**Table S1.** Pearson correlation coefficients (*r*) among elements concentrations in the shoots of maize plants var. Naudi at the 3–4 leaf stage after 41 days of cultivation in uncontaminated controls (Unt) and HM-metal-contaminated soil.

| Unt |        |        |         |         |        |       |       |        |       |        |       |
|-----|--------|--------|---------|---------|--------|-------|-------|--------|-------|--------|-------|
|     | Ca     | Cd     | Co      | Cu      | K      | Mg    | Ni    | P      | Pb    | S      | Zn    |
| Ca  |        | 0.21   | -0.39   | 0.90    | 0.13   | 0.98* | 0.37  | 0.55   | 0.05  | -0.19  | 0.91  |
| Cd  | 0.21   |        | 0.30    | 0.15    | -0.92* | 0.04  | 0.96* | -0.63  | 0.63  | 0.33   | 0.57  |
| Co  | -0.39  | 0.30   |         | -0.0004 | -0.60  | -0.49 | 0.03  | -0.22  | 0.87  | 0.98*  | -0.11 |
| Cu  | 0.90   | 0.15   | -0.0004 |         | 0.07   | 0.87  | 0.20  | 0.67   | 0.36  | 0.22   | 0.85  |
| K   | 0.13   | -0.92* | -0.60   | 0.07    |        | 0.30  | -0.78 | 0.74   | -0.77 | -0.57  | -0.28 |
| Mg  | 0.98*  | 0.04   | -0.49   | 0.87    | 0.30   |       | 0.23  | 0.65   | -0.09 | -0.29  | 0.83  |
| Ni  | 0.37   | 0.96*  | 0.03    | 0.20    | -0.78  | 0.22  |       | -0.56  | 0.43  | 0.07   | 0.67  |
| P   | 0.55   | -0.63  | -0.22   | 0.67    | 0.74   | 0.65  | -0.56 |        | -0.19 | -0.07  | 0.24  |
| Pb  | 0.05   | 0.63   | 0.87    | 0.36    | -0.77  | -0.09 | 0.43  | -0.19  |       | 0.93   | 0.38  |
| S   | -0.19  | 0.33   | 0.98*   | 0.22    | -0.57  | -0.29 | 0.07  | -0.07  | 0.93  |        | 0.08  |
| Zn  | 0.91   | 0.57   | -0.11   | 0.85    | -0.28  | 0.83  | 0.67  | 0.24   | 0.38  | 0.08   |       |
| HM  |        |        |         |         |        |       |       |        |       |        |       |
|     | Ca     | Cd     | Co      | Cu      | K      | Mg    | Ni    | P      | Pb    | S      | Zn    |
| Ca  |        | 0.86   | 0.99    | 0.99**  | 0.77   | 0.94  | 0.22  | 0.90   | 0.60  | 0.98*  | 0.74  |
| Cd  | 0.86   |        | 0.93    | 0.80    | 0.85   | 0.98* | 0.43  | 0.99** | 0.13  | 0.74   | 0.48  |
| Co  | 0.99*  | 0.93   |         | 0.96*   | 0.80   | 0.98* | 0.26  | 0.96*  | 0.48  | 0.93   | 0.66  |
| Cu  | 0.99** | 0.80   | 0.96*   |         | 0.75   | 0.91  | 0.20  | 0.85   | 0.66  | 0.99** | 0.78  |
| K   | 0.77   | 0.85   | 0.80    | 0.75    |        | 0.87  | 0.78  | 0.82   | 0.04  | 0.75   | 0.78  |
| Mg  | 0.94   | 0.98*  | 0.98*   | 0.91    | 0.87   |       | 0.39  | 0.99*  | 0.31  | 0.86   | 0.62  |
| Ni  | 0.22   | 0.43   | 0.26    | 0.20    | 0.78   | 0.39  |       | 0.35   | -0.46 | 0.24   | 0.55  |
| P   | 0.90   | 0.99** | 0.96*   | 0.85    | 0.82   | 0.99* | 0.35  |        | 0.23  | 0.79   | 0.49  |
| Pb  | 0.60   | 0.13   | 0.48    | 0.66    | 0.04   | 0.31  | -0.46 | 0.23   |       | 0.69   | 0.48  |
| S   | 0.98*  | 0.74   | 0.93    | 0.99**  | 0.75   | 0.86  | 0.24  | 0.79   | 0.69  |        | 0.85  |
| Zn  | 0.73   | 0.48   | 0.66    | 0.78    | 0.78   | 0.62  | 0.55  | 0.49   | 0.48  | 0.85   |       |

\* Significance at  $P \leq 0.05$  (in blue); \*\* Significance at  $P \leq 0.01$  (in red); ns: Not significant (in grey).

**Table S2.** Pearson correlation coefficients (*r*) between concentrations of each element in pore water and in shoots of maize plants var. Naudi at the 3–4 leaf stage after 41 days of cultivation in uncontaminated controls (Unt) and HM-metal-contaminated soil.

|    | r        |        |        |
|----|----------|--------|--------|
|    | All data | Unt    | HM     |
| Ca | 0.85     | 0.00   | 0.54   |
| Cd | 0.09     | n.d.   | 0.09   |
| Co | 0.78*    | -0.95* | 0.11   |
| Cu | 0.71*    | 0.61   | -0.01  |
| K  | -0.93**  | -0.08  | -0.13  |
| Mg | 0.90**   | -0.75  | 0.46   |
| Ni | 0.38     | -0.40  | -0.54  |
| P  | -0.27    | 0.30   | -0.30  |
| Pb | n.d.     | n.d.   | n.d.   |
| S  | 0.88**   | -0.07  | 0.45   |
| Zn | 0.50     | 0.91   | -0.94* |

\* Significance at  $P \leq 0.05$  (in blue); \*\* Significance at  $P \leq 0.01$  (in red); ns: Not significant (in grey).
